# Supplementary material for: Risk-Based Colposcopy for Cervical Precancer Detection: A Cross-Sectional Multicenter Study in China
Source: MDPI journal article supplement (doi:10.3390/diagnostics12112585), 2022-10-25
Supplement: s1 [file s1]

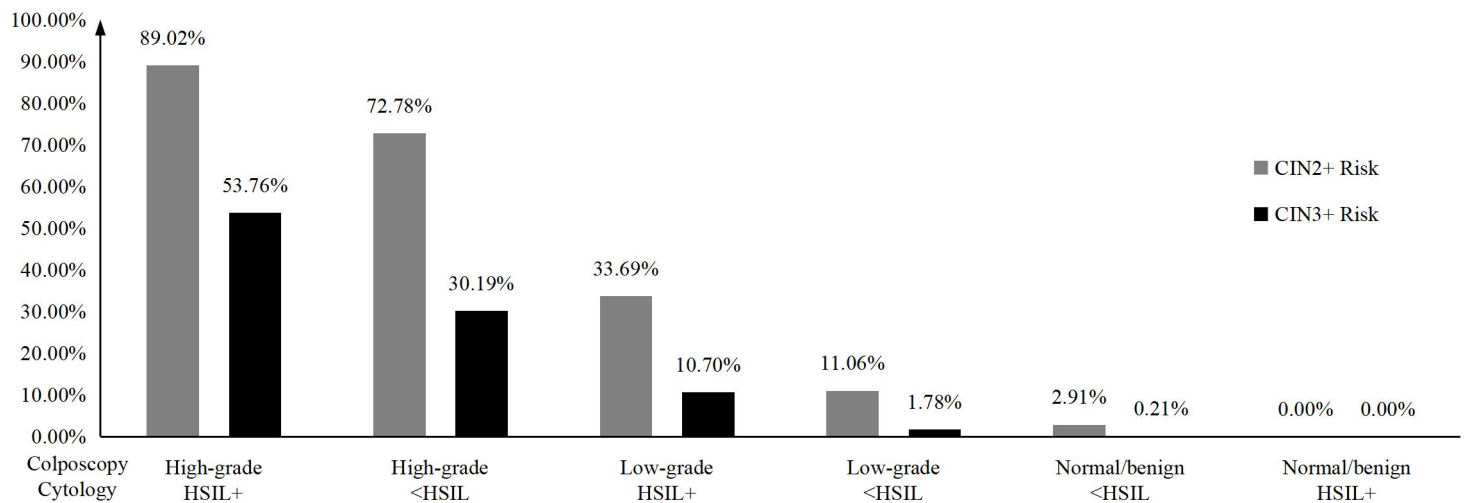

**FIGURE S1** | The sequence of cervical precancers risk strata based on colposcopy and cytology. Abbreviations: CIN2+, cervical intraepithelial neoplasia grade2 or worse; CIN3+, cervical intraepithelial neoplasia grade3 or worse; <HSIL, includes negative for intraepithelial lesion or malignancy (NILM), atypical squamous cells of undetermined significance (ASC-US), low-grade squamous intraepithelial lesion (LSIL); HSIL+, high-grade squamous intraepithelial lesion or worse.

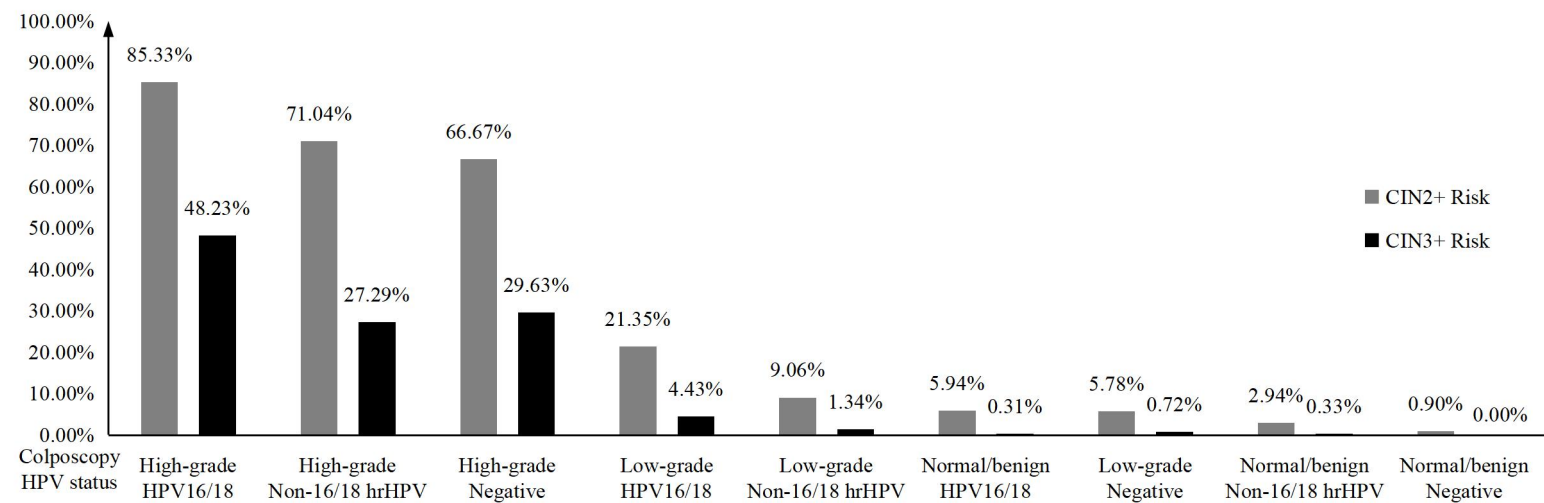

**FIGURE S2** |The sequence of cervical precancers risk strata based on colposcopy and HPV status. Abbreviations: CIN2+, cervical intraepithelial neoplasia grade2 or worse; CIN3+, cervical intraepithelial neoplasia grade3 or worse; HPV, human papillomavirus; hrHPV, high-risk HPV.
